# Supplementary material
Source: PubMed Central journal article supplement (PMC11368621)
Supplement: NIHMS1977822-supplement-Appendix_Tables_1-3.pdf [file NIHMS1977822-supplement-Appendix_Tables_1-3.pdf]

Appendix Table 1. Full results for the main analysis: likelihood of remaining in the community for 30 days or 180 days

|                                                  | 30-day       |         | 180-day     |         |
|--------------------------------------------------|--------------|---------|-------------|---------|
|                                                  | Estimates    | p-value | Estimates   | p-value |
| HCBS breadth (10%-point)                         | 0.00712**    | 0.0119  | 0.00627*    | 0.0893  |
| HCBS intensity (\$100)                           | 0.00120**    | 0.0259  | -0.000237   | 0.779   |
| Age                                              | -0.000639*** | <0.001  | -0.00222*** | <0.001  |
| Male                                             | -0.0326***   | <0.001  | -0.0543***  | <0.001  |
| Race: black                                      | 0.0126***    | 0.00232 | 0.00601     | 0.244   |
| Race: other                                      | 0.0369***    | <0.001  | 0.0682***   | <0.001  |
| Marital status: divorced                         | -0.00585     | 0.151   | -0.00378    | 0.464   |
| Marital status: never married                    | 0.00691      | 0.118   | 0.0286***   | <0.001  |
| Marital status: other                            | -0.0142      | 0.124   | 0.0306***   | 0.00878 |
| Marital status: separated                        | 0.00601      | 0.493   | 0.000289    | 0.979   |
| Marital status: widowed                          | -0.00683*    | 0.0604  | -0.00737*   | 0.0973  |
| Original Medicare entitlement: disability        | -0.00607**   | 0.0488  | -0.0242***  | <0.001  |
| Original Medicare entitlement: ESRD              | -0.0764***   | 0.00191 | -0.194***   | <0.001  |
| Original Medicare entitlement: disability & ESRD | -0.128***    | <0.001  | -0.204***   | <0.001  |
| ADL                                              | -0.00648***  | <0.001  | -0.00710*** | <0.001  |
| CFS: mild impairment                             | -0.0248***   | <0.001  | -0.0274***  | <0.001  |
| CFS: moderate impairment                         | -0.0355***   | <0.001  | -0.0451***  | <0.001  |
| CFS: severe impairment                           | -0.0597***   | <0.001  | -0.0572***  | <0.001  |
| CFS: missing                                     | -0.0255***   | <0.001  | -0.0310***  | <0.001  |
| Anemia                                           | -0.0136***   | <0.001  | -0.0277***  | <0.001  |
| Heart failure                                    | -0.0530***   | <0.001  | -0.0986***  | <0.001  |
| Hypertension                                     | 0.00373      | 0.239   | 0.00472     | 0.246   |
| Diabetes                                         | -0.00438     | 0.179   | -0.00885**  | 0.0337  |
| ADRD                                             | -0.0121***   | <0.001  | -0.0291***  | <0.001  |
| Asthma/COPD                                      | -0.0257***   | <0.001  | -0.0611***  | <0.001  |
| Pneumonia                                        | -0.0159***   | <0.001  | -0.0236***  | <0.001  |
| Hip fracture                                     | 0.0570***    | <0.001  | 0.107***    | <0.001  |
| Other fracture                                   | 0.0278***    | <0.001  | 0.0490***   | <0.001  |
| Malnutrition                                     | -0.0354***   | <0.001  | -0.0468***  | <0.001  |
| Anxiety                                          | -0.0271***   | <0.001  | -0.0386***  | <0.001  |
| Manic depression                                 | -0.0132      | 0.106   | -0.0344***  | <0.001  |
| Psychotic disorder                               | -0.0159**    | 0.0439  | -0.0233**   | 0.0129  |
| Schizophrenia                                    | 0.0160*      | 0.0502  | 0.00278     | 0.796   |
| Incontinence                                     | -0.0393***   | <0.001  | -0.0640***  | <0.001  |
| Shortness of breath: exertion                    | -0.0371***   | <0.001  | -0.0630***  | <0.001  |
| Shortness of breath: sitting                     | -0.0604***   | <0.001  | -0.0519***  | <0.001  |
| Shortness of breath: lying flat                  | -0.0115*     | 0.0943  | -0.0146*    | 0.0588  |
| Swallow problem                                  | -0.0134*     | 0.0721  | -0.0317***  | <0.001  |
| Weight loss                                      | -0.0144***   | <0.001  | -0.0138***  | <0.001  |
| Insulin injection                                | -0.0299***   | <0.001  | -0.0555***  | <0.001  |
| Year: 2011                                       | 0.0106**     | 0.0437  | 0.0232***   | <0.001  |
| Year: 2012                                       | 0.0181***    | 0.00102 | 0.0369***   | <0.001  |
| Year: 2013                                       | 0.0246***    | <0.001  | 0.0577***   | <0.001  |

Appendix Table 2. no hospitalization the same day or within 3 days of SNF discharge

| <b>1. Remaining in the community (alive and no NH admission/hospitalization), linear probability model with SNF fixed-effects</b> |                             |         |                                  |         |
|-----------------------------------------------------------------------------------------------------------------------------------|-----------------------------|---------|----------------------------------|---------|
| <b>30-day</b>                                                                                                                     | No same day hospitalization |         | No hospitalization within 3 days |         |
| Variables                                                                                                                         | Estimates                   | p-value | Estimates                        | p-value |
| HCBS breadth (10%-point)                                                                                                          | 0.00743***                  | 0.00968 | 0.00750***                       | 0.00731 |
| HCBS intensity (\$100)                                                                                                            | 0.00166***                  | <0.001  | 0.00149***                       | 0.00181 |
| <b>180-day</b>                                                                                                                    |                             |         |                                  |         |
| Variables                                                                                                                         | Estimates                   | p-value | Estimates                        | p-value |
| HCBS breadth (10%-point)                                                                                                          | 0.00791**                   | 0.0373  | 0.00755*                         | 0.0508  |
| HCBS intensity (\$100)                                                                                                            | 0.00002.57                  | 0.977   | -0.0000971                       | 0.912   |
| <b>2. Remaining in the community (alive and no NH admission), linear probability model with SNF fixed-effects</b>                 |                             |         |                                  |         |
| <b>30-day</b>                                                                                                                     | No same day hospitalization |         | No hospitalization within 3 days |         |
| Variables                                                                                                                         | Estimates                   | p-value | Estimates                        | p-value |
| HCBS breadth (10%-point)                                                                                                          | 0.00840***                  | <0.001  | 0.00712***                       | 0.00124 |
| HCBS intensity (\$100)                                                                                                            | 0.000835**                  | 0.0368  | 0.000723*                        | 0.0639  |
| <b>180-day</b>                                                                                                                    |                             |         |                                  |         |
| Variables                                                                                                                         | Estimates                   | p-value | Estimates                        | p-value |
| HCBS breadth (10%-point)                                                                                                          | 0.0132***                   | <0.001  | 0.0133***                        | <0.001  |
| HCBS intensity (\$100)                                                                                                            | 0.000414                    | 0.577   | 0.000380                         | 0.610   |
| <b>3. death, linear probability model with SNF fixed-effects</b>                                                                  |                             |         |                                  |         |
| <b>30-day</b>                                                                                                                     | No same day hospitalization |         | No hospitalization within 3 days |         |
| Variables                                                                                                                         | Estimates                   | p-value | Estimates                        | p-value |
| HCBS breadth (10%-point)                                                                                                          | -0.00200*                   | 0.0503  | -0.00150                         | 0.128   |
| HCBS intensity (\$100)                                                                                                            | -0.0000297                  | 0.875   | -0.000117                        | 0.504   |
| <b>180-day</b>                                                                                                                    |                             |         |                                  |         |
| Variables                                                                                                                         | Estimates                   | p-value | Estimates                        | p-value |
| HCBS breadth (10%-point)                                                                                                          | -0.00181                    | 0.444   | -0.00200                         | 0.395   |
| HCBS intensity (\$100)                                                                                                            | 0.000203                    | 0.656   | 2.30e-05                         | 0.959   |
| <b>4. NH admission, proportional hazards model with mixed-effects</b>                                                             |                             |         |                                  |         |
| <b>30-day</b>                                                                                                                     | No same day hospitalization |         | No hospitalization within 3 days |         |
| Variables                                                                                                                         | Hazard ratio                | p-value | Hazard ratio                     | p-value |
| HCBS breadth (10%-point)                                                                                                          | 0.957**                     | 0.0119  | 0.962**                          | 0.0347  |
| HCBS intensity (\$100)                                                                                                            | 0.988**                     | 0.0171  | 0.991*                           | 0.0812  |
| <b>180-day</b>                                                                                                                    |                             |         |                                  |         |
| Variables                                                                                                                         | Hazard ratio                | p-value | Hazard ratio                     | p-value |
| HCBS breadth (10%-point)                                                                                                          | 0.966***                    | 0.00288 | 0.965***                         | 0.00317 |
| HCBS intensity (\$100)                                                                                                            | 0.994**                     | 0.0451  | 0.995*                           | 0.0901  |
| <b>5. Any hospitalizations, linear probability model with SNF fixed-effects</b>                                                   |                             |         |                                  |         |
| <b>30-day</b>                                                                                                                     | No same day hospitalization |         | No hospitalization within 3 days |         |
| Variables                                                                                                                         | Estimates                   | p-value | Estimates                        | p-value |
| HCBS breadth (10%-point)                                                                                                          | -0.00456*                   | 0.0946  | -0.00432*                        | 0.0960  |
| HCBS intensity (\$100)                                                                                                            | -0.00155***                 | <0.001  | -0.00135***                      | 0.00125 |
| <b>180-day</b>                                                                                                                    |                             |         |                                  |         |

| Variables                | Estimates | p-value | Estimates | p-value |
|--------------------------|-----------|---------|-----------|---------|
| HCBS breadth (10%-point) | -0.00361  | 0.359   | -0.00283  | 0.480   |
| HCBS intensity (\$100)   | -0.000521 | 0.550   | -0.000410 | 0.637   |

Appendix Table 3. Estimates for the likelihood of “remaining in the community” from various models

| <b>Model 1: excluding SNFs with fewer than 5 individuals in the sample</b>    |             |         |
|-------------------------------------------------------------------------------|-------------|---------|
| <b>30-day</b>                                                                 |             |         |
| Variables                                                                     | Estimates   | p-value |
| HCBS breadth (10%-point)                                                      | 0.00549*    | 0.0586  |
| HCBS intensity (\$100)                                                        | 0.000955*   | 0.0773  |
| <b>180-day</b>                                                                |             |         |
| Variables                                                                     | Estimates   | p-value |
| HCBS breadth (10%-point)                                                      | 0.00591     | 0.121   |
| HCBS intensity (\$100)                                                        | -0.000165   | 0.851   |
| <b>Model 2: linear model for NH admission, excluding decedents</b>            |             |         |
| <b>30-day</b>                                                                 |             |         |
| Variables                                                                     | Estimates   | p-value |
| HCBS breadth (10%-point)                                                      | -0.00566*** | 0.00696 |
| HCBS intensity (\$100)                                                        | -0.000870** | 0.0141  |
| <b>180-day</b>                                                                |             |         |
| Variables                                                                     | Estimates   | p-value |
| HCBS breadth (10%-point)                                                      | -0.0116***  | <0.001  |
| HCBS intensity (\$100)                                                        | -0.000697   | 0.321   |
| <b>Model 3: Competing risk model for NH admission (Hazard ratio reported)</b> |             |         |
| <b>30-day</b>                                                                 |             |         |
| Variables                                                                     | Estimates   | p-value |
| HCBS breadth (10%-point)                                                      | 0.991       | 0.273   |
| HCBS intensity (\$100)                                                        | 0.992***    | 0.00955 |
| <b>180-day</b>                                                                |             |         |
| Variables                                                                     | Estimates   | p-value |
| HCBS breadth (10%-point)                                                      | 1.001       | 0.815   |
| HCBS intensity (\$100)                                                        | 0.997       | 0.211   |
| <b>Model 4: two-step selection model</b>                                      |             |         |
| <b>30-day</b>                                                                 |             |         |
| Variables                                                                     | Estimates   | p-value |
| HCBS breadth (10%-point)                                                      | 0.00228**   | 0.0334  |
| HCBS intensity (\$100)                                                        | 0.00124***  | <0.001  |
| <b>180-day</b>                                                                |             |         |
| Variables                                                                     | Estimates   | p-value |
| HCBS breadth (10%-point)                                                      | 0.00207     | 0.132   |
| HCBS intensity (\$100)                                                        | 0.000637    | 0.222   |
